# Supplementary material for: Cerium oxide as a promoter for the electro-oxidation reaction of ethanol: in situ XAFS characterization of the Pt nanoparticles supported on CeO2 nanoparticles and nanorods
Source: Royal Society of Chemistry journal article supplement (doi:10.1039/c5cp04813c), 2015-01-01
Supplement: c5cp04813c1.pdf [file c5cp04813c1.pdf]

## Supporting Information

### ***In-situ* XAFS Characterization of the Electro-Oxidation Reaction of Ethanol on Pt Nanoparticles Supported on CeO<sub>2</sub> Nanoparticles and Nanorods in a Fuel Cell**

*Juan Corchado-García, Luis E. Betancourt, Carlos A. Vélez, Sanjaya D. Senanayake, Dario Stacchiola, Kotaro Sasaki, Maxime J-F Guinel, Yunyun Zhou, Chin Li Cheung, Carlos R. Cabrera*

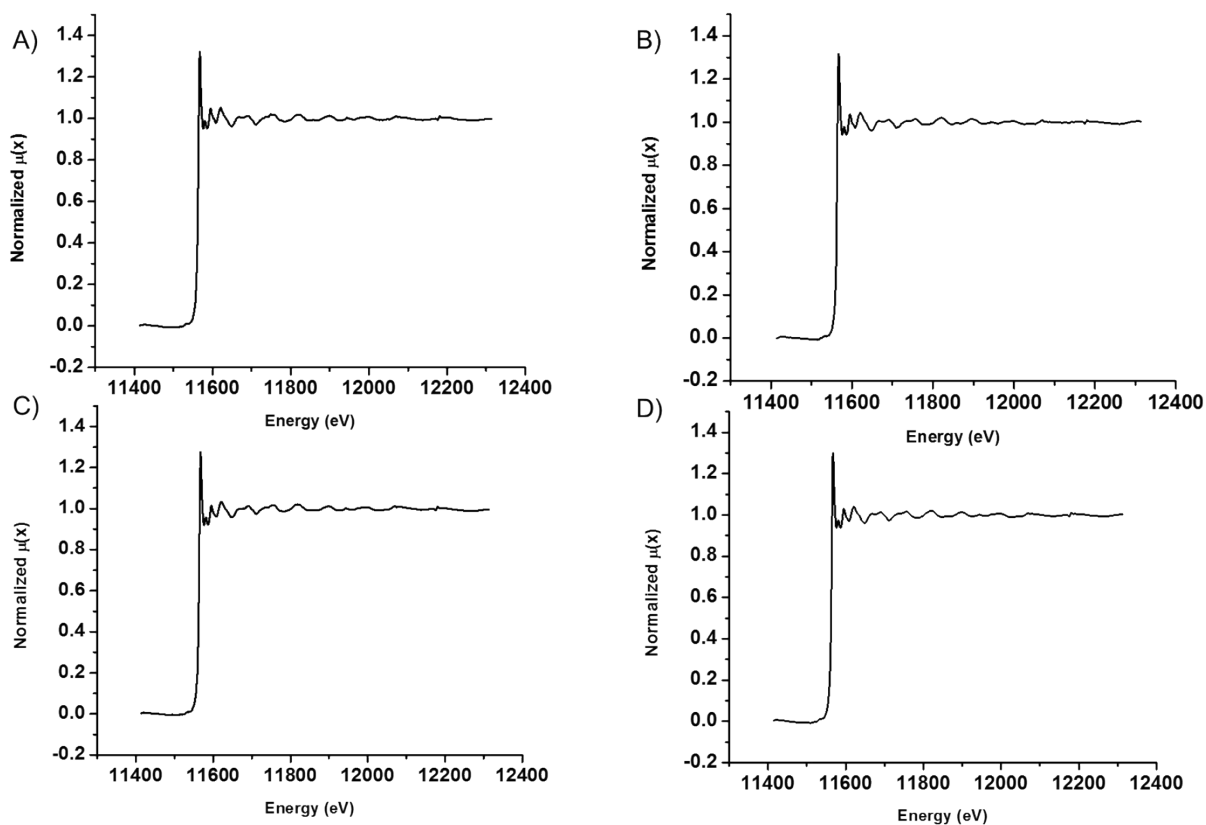

**Figure S1.** *In-situ* EXAFS of Pt/ceria NP in 0.1 M KOH at (A) -0.68 V (B) -0.35 V, (C) 0.00 V and (D) 0.30 V vs Ag/AgCl

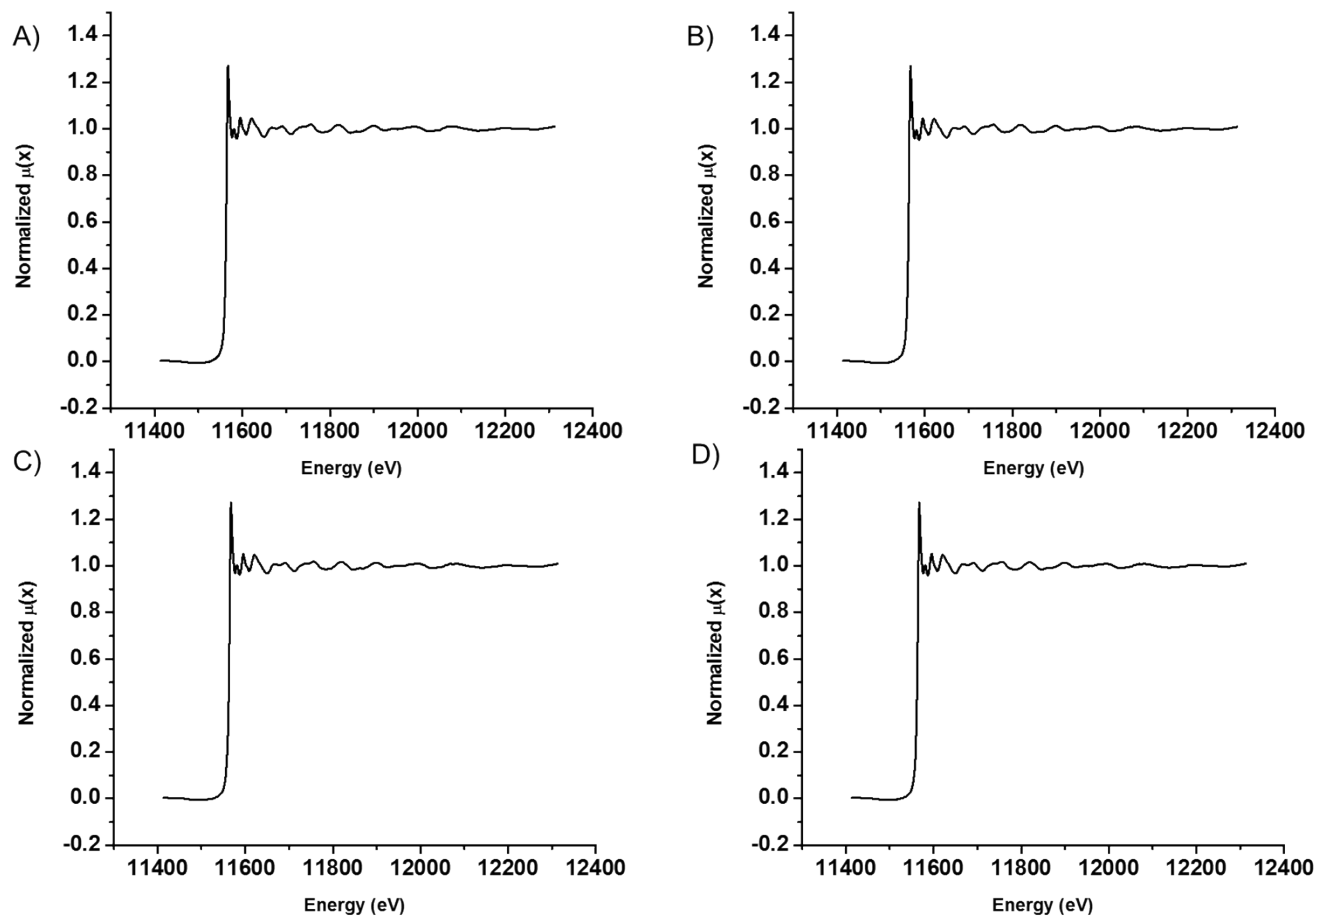

**Figure S2.** *In-situ* EXAFS of Pt/ceria NP in 0.5 M EtOH in 0.1 M KOH at (A) -0.68 V (B) -0.35 V, (C) 0.00 V and (D) 0.30 V vs Ag/AgCl.

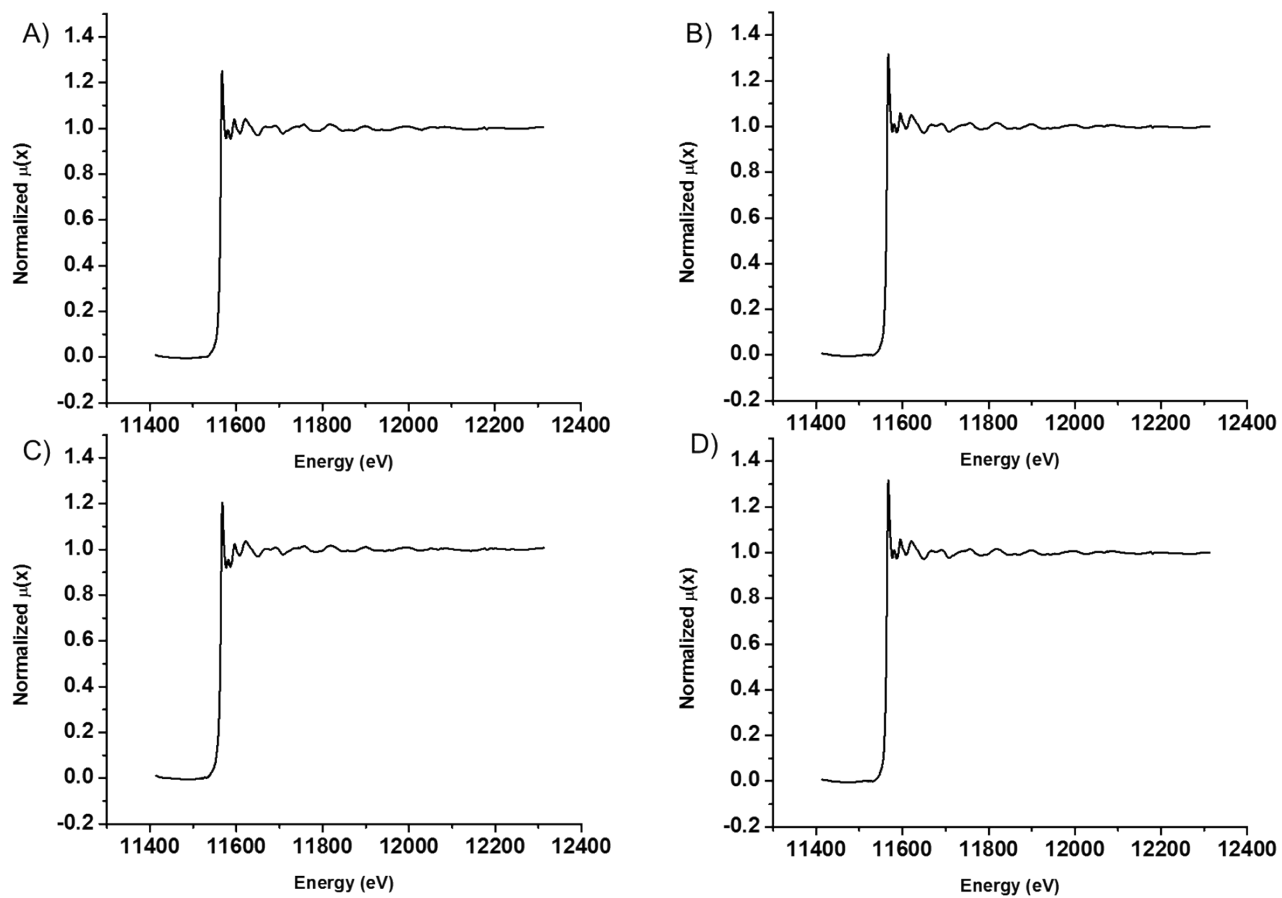

**Figure S3.** *In-situ* EXAFS on Pt/ceria NR in 0.1 M KOH (A) -0.68 V (B) -0.35 V, (C) 0.00 V and (D) 0.30 V vs Ag/AgCl.

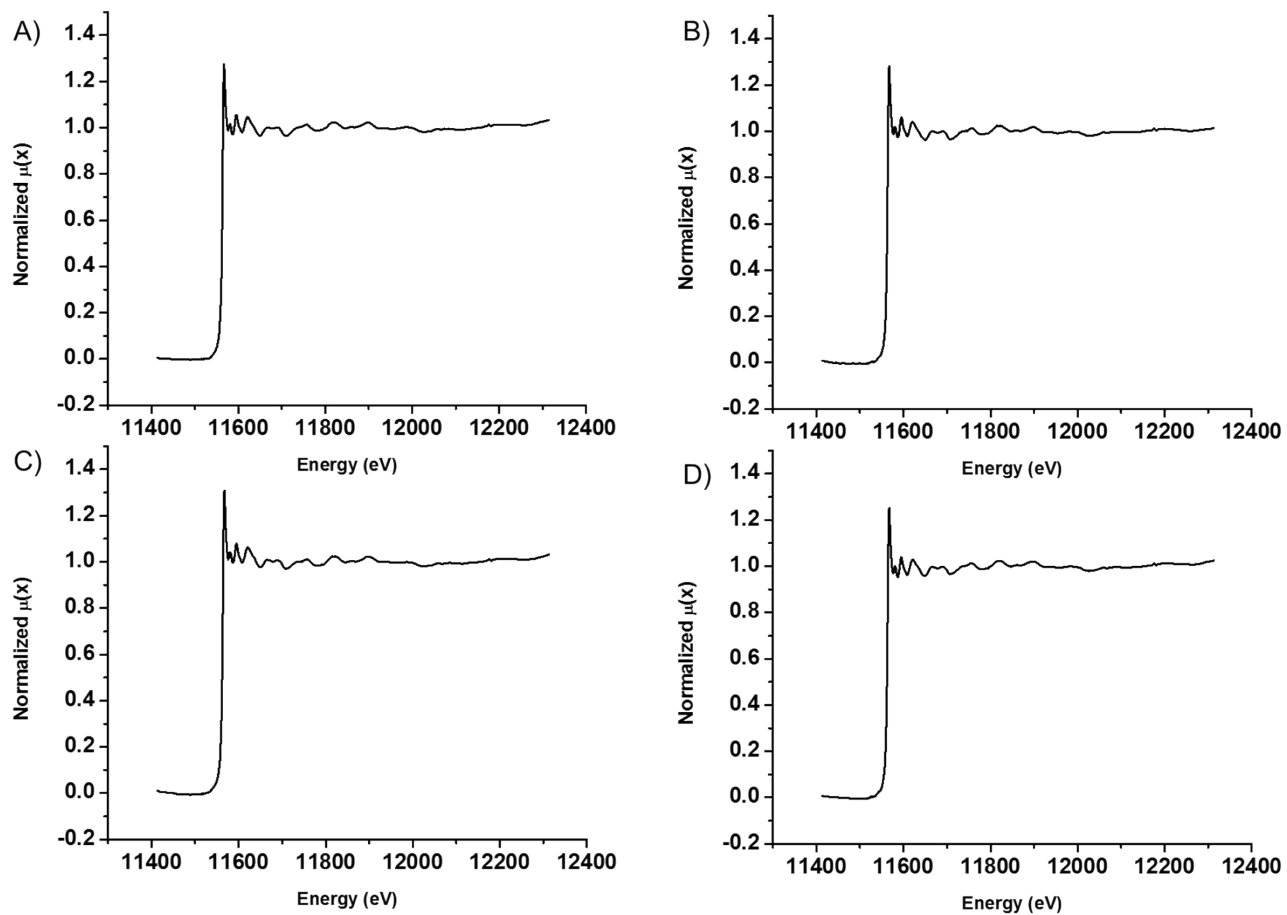

**Figure S4.** *In-situ* EXAFS of Pt/ceria NR in 0.5 M EtOH in 0.1 M KOH at (A) -0.68 V (B) - 0.35 V, (C) 0.00 V and (D) 0.30 V vs Ag/AgCl.

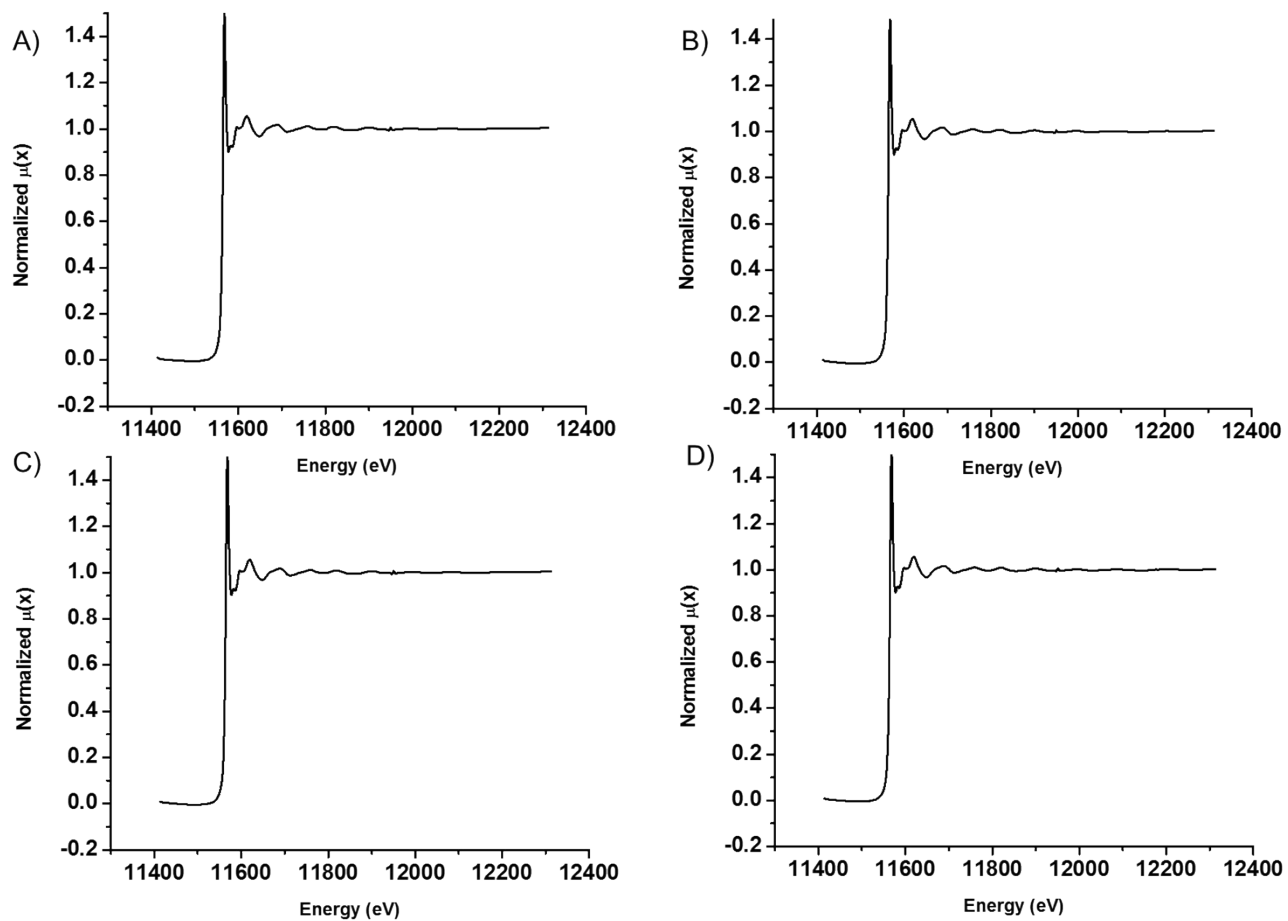

**Figure S5.** *In-situ* EXAFS on Pt/Vulcan in 0.1 M KOH (A) -0.68 V (B) -0.35 V, (C) 0.00 V and (D) 0.30 V vs Ag/AgCl.

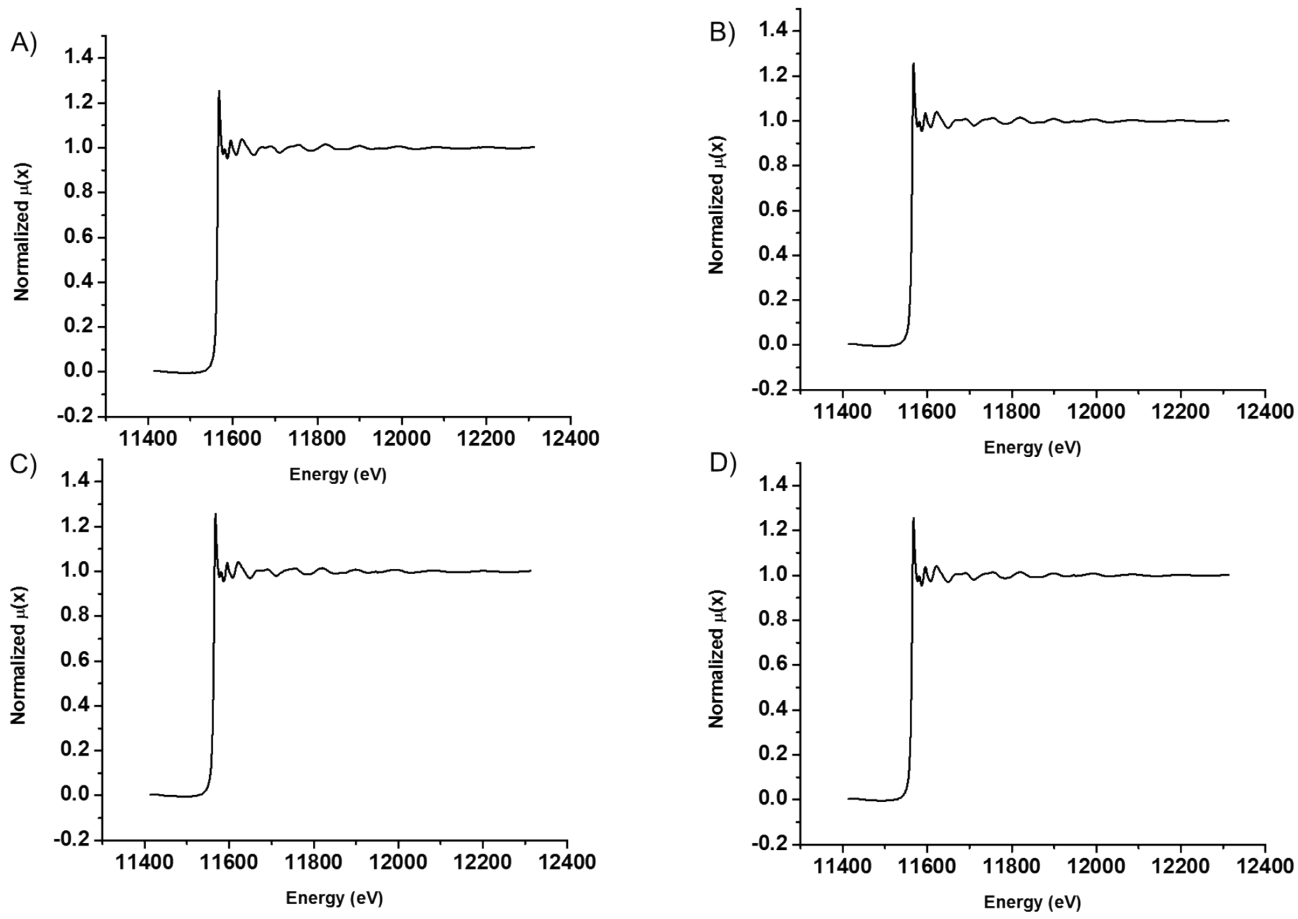

**Figure S6.** *In-situ* EXAFS of Pt/ceria NR in 0.5 M EtOH in 0.1 M KOH at (A) -0.68 V (B) -0.35 V, (C) 0.00 V and (D) 0.30 V vs Ag/AgCl.

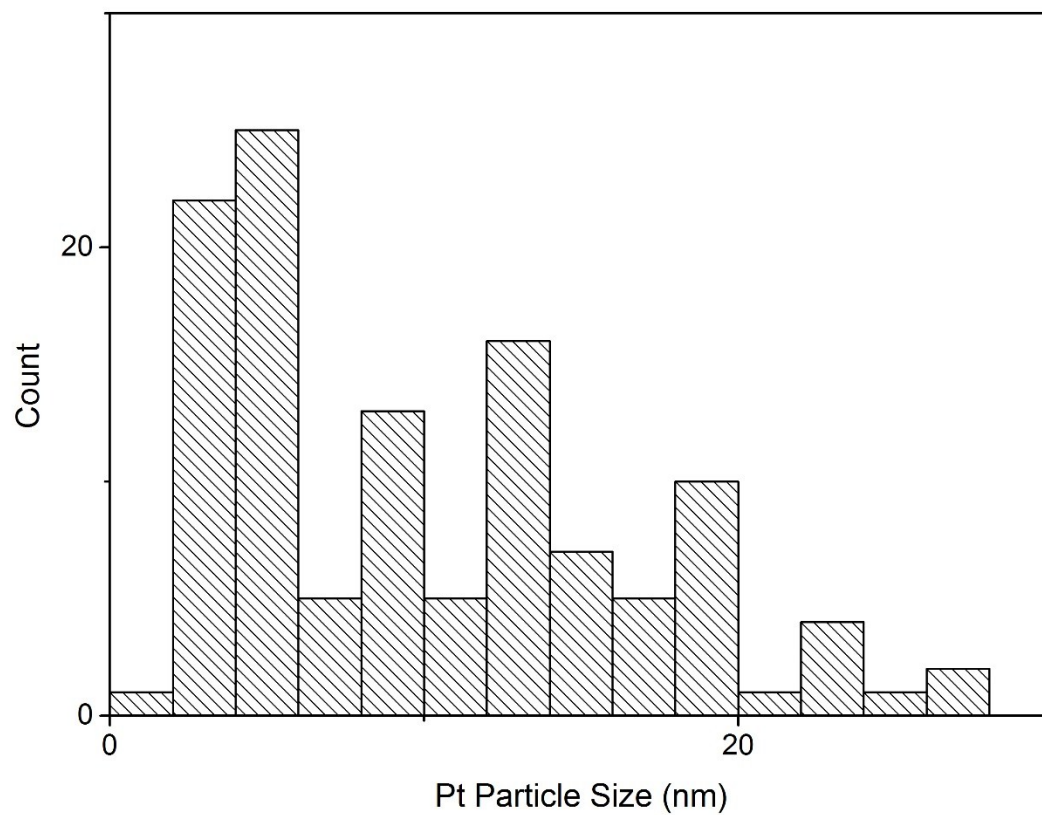

**Figure S7.** Histogram of Pt particle size distribution in the Pt/CeO<sub>2</sub> nanorods

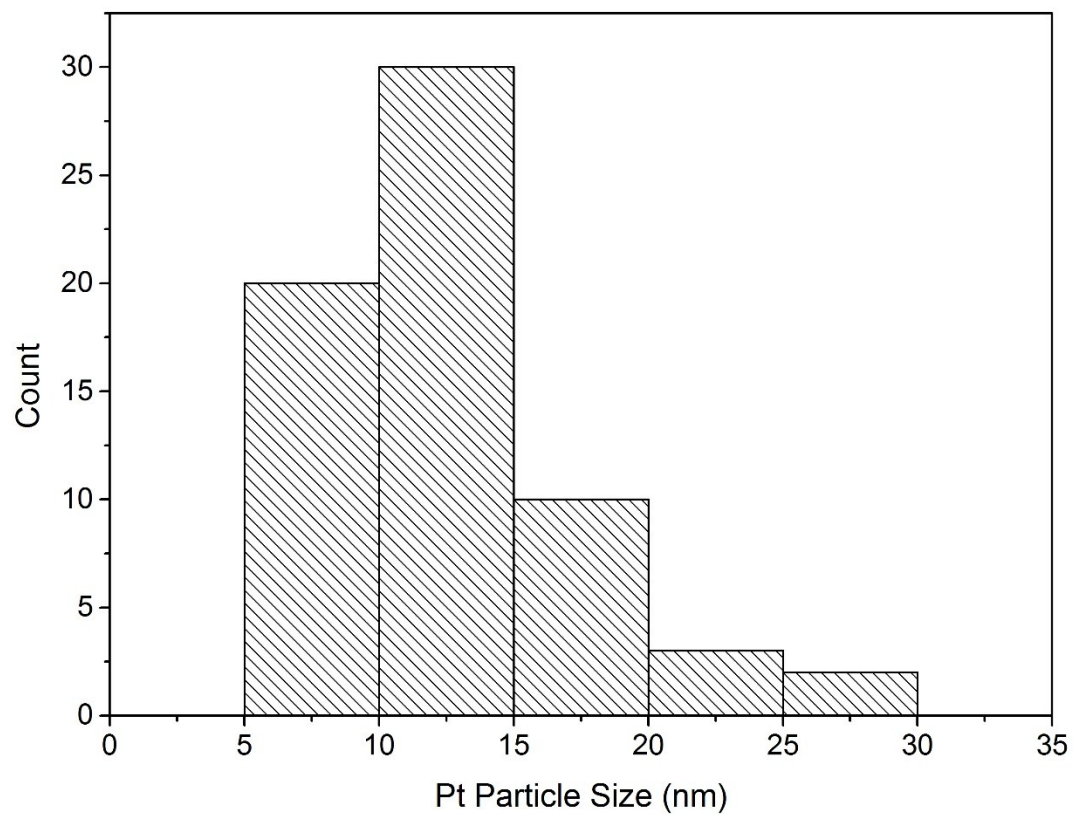

**Figure S8.** Histogram of Pt particle size distribution in the Pt/CeO<sub>2</sub> nanoparticles



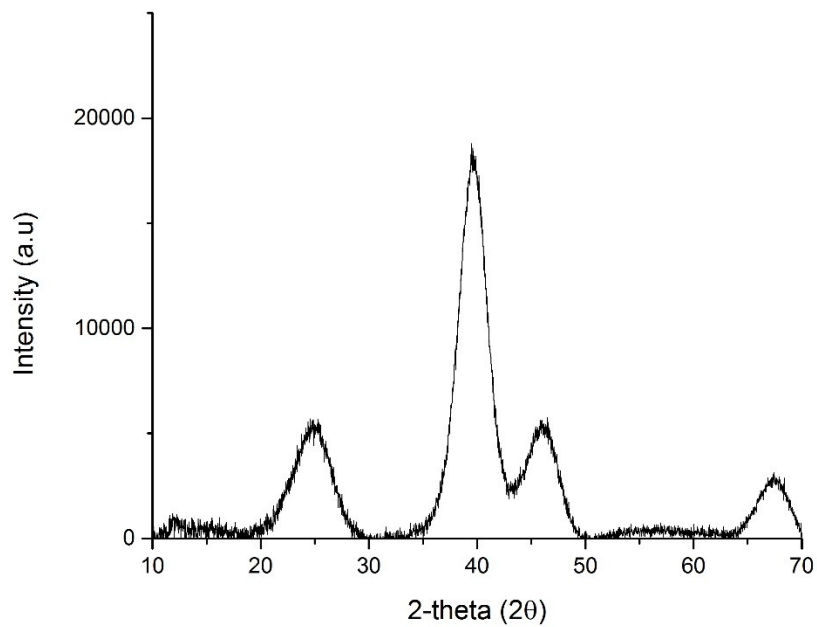

**Figure S9.** Ex-situ XRD spectra of the Pt Vulcan control. The particle size was determined to be  $(2.3 \pm 0.5)$  nm by the Halder-Wagner method.

| Catalyst               | Pt-Pt bond distance (Å) | Pt first shell coordination number |
|------------------------|-------------------------|------------------------------------|
| Pt/CeO <sub>2</sub> nP | $2.772 \pm 0.007$       | $10 \pm 1$                         |
| Pt/CeO <sub>2</sub> nR | $2.763 \pm 0.001$       | $10 \pm 1$                         |
| Theoretical Pt bulk    | 2.775                   | 12                                 |

**Table S1:** Calculated Pt-Pt bond distances and coordination number from EXAFS fitting.
